# Supplementary material
Source: publisher figshare collection journal article supplement (https://springernature.figshare.com/ndownloader/files/17580212)
Supplement: Supplementary file 1 [file 17580212]

## Sheet: Mothers
Offspring	Mother_id
2004_63	2004_18
2004_64	2004_18
2004_65	2004_24
2004_66	2004_24
2004_67	2004_24
2004_77	2004_18
2004_100	2004_18
2004_101	2004_18
2004_107	2004_30
2004_114	2004_18
2004_117	2004_24
2004_118	2004_30
2004_121	2004_64
2004_122	2004_30
2004_132	2004_67
2004_133	2004_118
2004_191	2004_30
2004_205	2004_18
2004_206	2004_118
2004_254	2004_67
2004_275	2004_24
2004_289	2004_64
2005_324	2004_117
2005_330	2004_30
2005_387	2004_118
2005_424	2005_387
2005_425	2004_285
2005_426	2004_285
2005_444	2005_387
2005_445	2005_387
2005_481	2005_325
2005_554	2005_387
2005_556	2005_387
2005_557	2005_387
2005_560	2005_322
2005_565	2005_322
2005_578	2005_322
2005_579	2005_442
2005_580	2005_442
2005_581	2005_325
2005_645	2005_477
2005_670	2005_564
2005_701	2005_322
2005_702	2005_325
2005_717	2005_444
2005_718	2005_387
2005_745	2005_387
2005_776	2005_442
2005_777	2005_581
2005_778	2005_776
2005_779	2005_322
2005_780	2005_639
2005_781	2004_285
2005_783	2005_776
2005_784	2005_425
2005_787	2005_554
2005_788	2005_646
2005_790	2005_387
2005_791	2005_776
2005_814	2005_442
2005_816	2005_564
2005_818	2005_425
2005_820	2005_670
2005_821	2005_387
2005_822	2005_322
2005_823	2005_325
2005_824	2005_444
2005_825	2005_322
2005_835	2005_791
2005_836	2005_325
2005_838	2005_814
2005_840	2005_814
2005_847	2005_564
2005_858	2005_639
2005_865	2005_325
2005_898	2005_322
2005_902	2005_788
2005_941	2005_322
2005_958	2005_814
2005_962	2005_791
2005_963	2005_791
2005_966	2005_481
2005_975	2005_442
2005_1002	2005_580
2005_1004	2005_581
2005_1028	2005_792
2005_1036	2005_442
2005_1037	2005_442
2005_1038	2004_285
2005_1045	2005_941
2005_1046	2005_779
2005_1074	2005_442
2005_1076	2005_646
2005_1078	2005_580
2005_1081	2005_581
2005_1082	2005_325
2005_1103	2005_322
2005_1107	2005_325
2005_1108	2005_442
2005_1109	2005_580
2005_1110	2005_442
2005_1111	2005_322
2005_1113	2005_559
2005_1114	2005_1084
2005_1115	2005_426
2005_1116	2005_387
2005_1117	2005_717
2005_1135	2005_792
2005_1145	2005_941
2005_1146	2005_941
2005_1150	2005_941
2005_1179	2005_941
2005_1180	2005_425
2005_1181	2005_481
2005_1184	2005_322
2005_1186	2005_922
2005_1193	2005_745
2005_1198	2005_776
2005_1216	2005_791
2005_1218	2005_793
2005_1219	2005_444
2005_1234	2005_477
2005_1265	2005_776
2005_1266	2005_817
2005_1269	2005_322
2005_1270	2005_427
2005_1271	2004_285
2005_1281	2005_580
2006_315	2006_43
2006_316	2006_43
2006_318	2006_43
2006_462	2006_189
2006_463	2006_43
2006_465	2006_189
2006_466	2006_64
2006_468	2006_43
2006_469	2006_43
2006_516	2006_43
2006_529	2006_318
2006_530	2006_64
2006_531	2006_43
2006_532	2006_315
2006_534	2006_43
2006_535	2006_64
2006_547	2006_315
2006_558	2006_318
2006_611	2006_318
2006_631	2006_64
2006_632	2006_43
2006_633	2006_318
2006_634	2006_43
2006_650	2006_468
2006_666	2006_318
2006_667	2006_315
2006_669	2006_468
2006_670	2006_315
2006_671	2006_64
2006_672	2006_43
2006_711	2006_64
2006_736	2006_548
2006_737	2006_468
2006_740	2006_318
2006_776	2006_318
2006_784	2006_530
2006_785	2006_532
2006_792	2006_147
2004_296	2004_152
2005_368	2004_296
2005_370	2005_337
2005_529	2005_368
2005_540	2004_295
2005_541	2004_295
2005_544	2004_296
2005_550	2004_295
2005_552	2005_337
2005_572	2005_338
2005_582	2005_338
2005_593	2005_337
2005_643	2005_411
2005_644	2005_411
2005_648	2005_411
2005_659	2005_533
2005_693	2005_528
2005_697	2005_528
2005_711	2005_337
2005_714	2004_295
2005_749	2005_528
2005_785	2005_370
2005_786	2005_553
2005_789	2005_553
2005_794	2005_528
2005_855	2005_582
2005_859	2005_411
2005_899	2005_528
2005_932	2005_448
2005_933	2005_572
2005_934	2004_295
2005_935	2005_338
2005_967	2005_448
2005_968	2005_448
2005_969	2005_584
2005_970	2005_411
2005_972	2004_295
2005_973	2005_643
2005_974	2005_648
2005_1041	2005_533
2005_1042	2005_370
2005_1064	2005_935
2005_1079	2005_368
2005_1080	2005_370
2005_1086	2005_533
2005_1088	2005_553
2005_1091	2005_934
2005_1092	2005_944
2005_1094	2005_370
2005_1119	2005_411
2005_1120	2005_368
2005_1121	2005_749
2005_1122	2005_584
2005_1124	2005_370
2005_1125	2005_411
2005_1126	2005_572
2005_1127	2005_448
2005_1129	2005_572
2005_1130	2005_648
2005_1133	2005_933
2005_1134	2005_368
2005_1167	2005_935
2005_1168	2005_582
2005_1169	2005_448
2005_1170	2005_972
2005_1171	2005_967
2005_1174	2005_650
2005_1182	2005_972
2005_1188	2005_448
2005_1214	2005_448
2005_1221	2005_643
2005_1222	2005_553
2005_1226	2005_1172
2005_1227	2005_643
2005_1228	2005_648
2005_1259	2005_477
2005_1260	2005_528
2005_1261	2005_935
2005_1264	2005_794
2006_59	2005_533
2006_61	2006_3
2006_93	2005_1088
2006_114	2006_92
2006_116	2006_3
2006_181	2006_93
2006_186	2006_92
2006_187	2006_93
2006_254	2006_93
2006_255	2005_1042
2006_256	2006_93
2006_275	2005_1042
2006_279	2006_256
2006_397	2006_284
2006_398	2006_186
2006_411	2006_93
2006_433	2006_348
2006_494	2006_411
2006_502	2006_255
2006_507	2006_397
2006_508	2006_397
2006_512	2006_411
2006_526	2006_61
2006_539	2006_398
2006_601	2006_186
2006_602	2006_255
2006_603	2006_92
2006_604	2006_509
2006_605	2006_411
2006_606	2006_255
2006_607	2006_116
2006_608	2006_508
2006_635	2006_509
2006_637	2006_61
2006_639	2006_255
2006_645	2006_275
2006_658	2006_256
2006_659	2006_182
2006_660	2006_186
2006_662	2006_186
2006_663	2006_613
2006_664	2006_255
2006_691	2006_186
2006_713	2006_92
2006_771	2006_3
2006_773	2006_256
2006_793	2006_275
2004_45	2004_26
2004_49	2004_5
2004_50	2004_6
2004_51	2004_6
2004_52	2004_6
2004_71	2004_5
2004_80	2004_5
2004_92	2004_81
2004_98	2004_26
2004_163	2004_49
2004_190	2004_50
2004_196	2004_49
2004_198	2004_81
2004_199	2004_49
2004_231	2004_103
2004_232	2004_103
2004_241	2004_179
2005_318	2004_80
2005_380	2004_49
2005_417	2005_349
2005_440	2005_377
2005_452	2005_318
2005_454	2005_419
2005_469	2005_340
2005_471	2005_456
2005_492	2005_456
2005_612	2005_340
2005_613	2005_340
2005_650	2005_456
2005_663	2004_122
2005_698	2005_318
2005_706	2005_349
2005_852	2005_349
2005_921	2005_340
2005_925	2005_376
2005_930	2005_689
2005_971	2005_340
2005_1030	2005_650
2005_1056	2005_350
2005_1128	2005_469
2005_1202	2005_350
2006_8	2005_419
2006_9	2005_493
2006_18	2005_703
2006_63	2005_452
2006_67	2005_493
2006_135	2006_67
2006_136	2005_457
2006_147	2006_133
2006_148	2006_67
2006_246	2006_147
2006_250	2006_147
2006_326	2006_136
2006_346	2006_147
2006_347	2006_67
2006_348	2006_326
2006_381	2005_636
2006_387	2006_246
2006_400	2006_133
2006_423	2006_282
2006_426	2006_134
2006_435	2006_81
2006_488	2006_282
2006_490	2006_133
2006_491	2006_147
2006_492	2006_346
2006_497	2006_433
2006_537	2006_430
2006_554	2006_348
2006_586	2006_348
2006_588	2006_147
2006_591	2006_134
2006_594	2006_133
2006_595	2005_452
2006_715	2006_133
2006_716	2006_346
